# Supplementary material for: Frost-Heaving Cracking Sensitivity of Single-Flaw Rock Mass Based on a Numerical Experimental Method
Source: Hindawi journal article supplement (doi:10.1155/2021/3436119), 2021-09-14
Supplement: f1 [file 3436119.f1.doc]

**Highlights**

1. RFPA2D-Thermal is a new numerical method for simulating frost-heaving cracking
2. The pre-existing flaw with different inclination angle, flaw length and cooling rate mainly propagate along the flaw coplanar direction
3. Contribution rate of various factors to secondary crack length: flaw width > inclination angle > cooling rate > flaw length
4. The prediction model of secondary crack length was established as follows: *y*=-14.751+13.668*x*1+0.08*x*2-1.621*x*3+0.345*x*4
